# Supplementary material
Source: Springer Nature journal article supplement (https://mijn.bsl.nl/resource/supplementary/13047_2008_87_MOESM7_ESM.pdf/7109568)

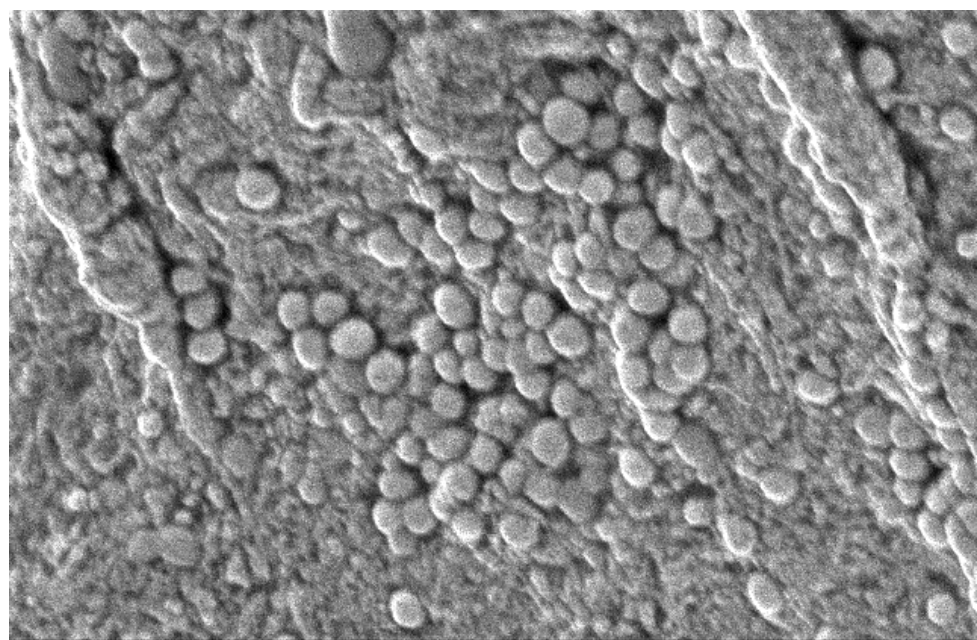

12kV

X7,000

2µm

Supplement: MOESM7 [file 7109568]
